# Supplementary material for: Heterozygosity for cervid S138N polymorphism results in subclinical CWD in gene-targeted mice and progressive inhibition of prion conversion
Source: PubMed Central journal article supplement — Proc Natl Acad Sci U S A. 2023 Apr 4;120(15):e2221060120. doi: 10.1073/pnas.2221060120 (PMC10104538; doi:10.1073/pnas.2221060120), 2023-04-04
Supplement: pnas.2221060120.sapp.pdf [file pnas.2221060120.sapp.pdf]

## Supporting Information for

Heterozygosity for cervid S138N polymorphism results in subclinical CWD in gene-targeted mice and progressive inhibition of prion conversion

Maria I. Arifin<sup>1</sup>, Lech Kaczmarczyk<sup>2</sup>, Doris Zeng<sup>1</sup>, Samia Hannaoui<sup>1</sup>, Chi Lee<sup>1</sup>, Sheng-Chun Chang<sup>1</sup>, Gordon Mitchell<sup>3</sup>, Debbie McKenzie<sup>4</sup>, Michael Beekes<sup>5</sup>, Walker Jackson<sup>2</sup> and Sabine Gilch<sup>1</sup>

Corresponding author: Sabine Gilch

Email: [sgilch@ucalgary.ca](mailto:sgilch@ucalgary.ca)

**This PDF file includes:**

Figures S1 to S5

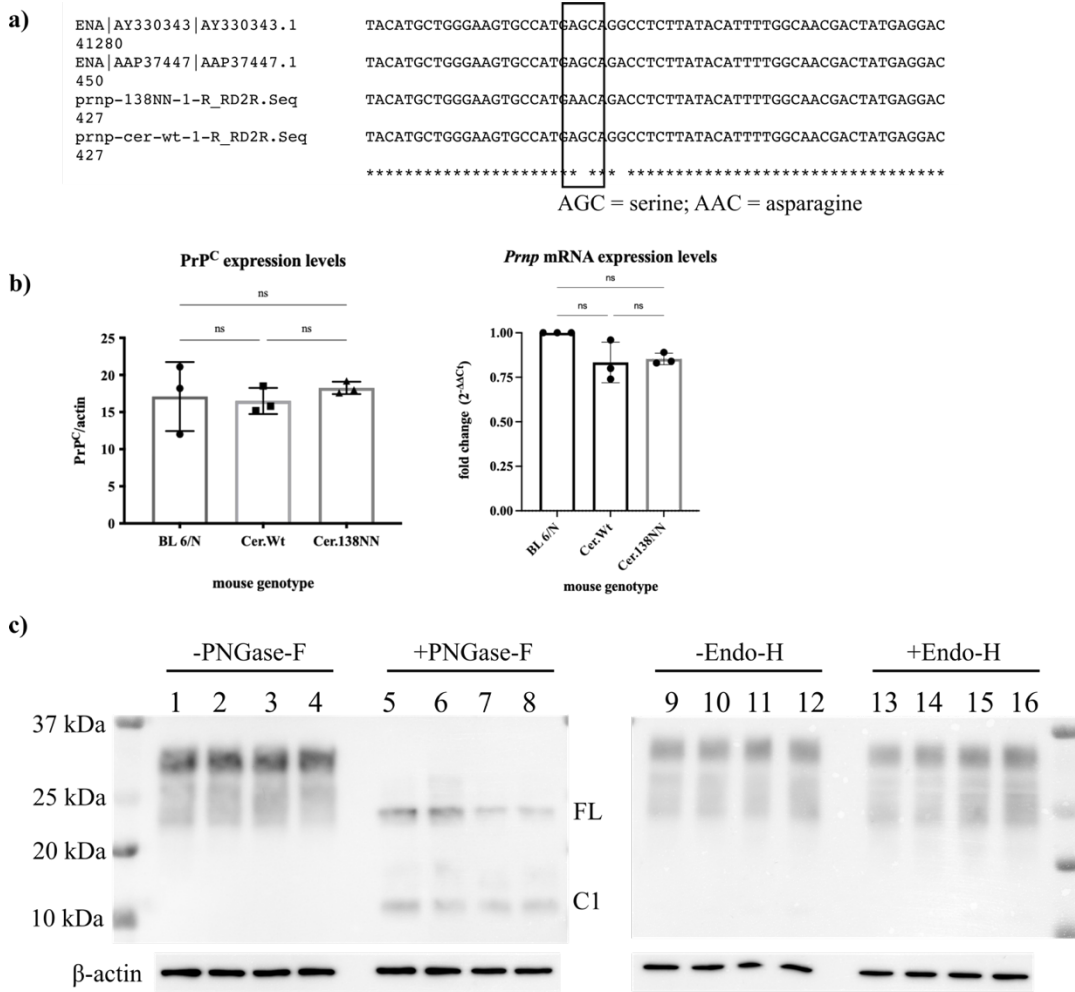

**Figure S1.** Cervid-*Prnp* knock-in mouse characterization. **(a)** *Prnp.Cer.Wt* and *Prnp.Cer.138NN* gene-targeted mice *Prnp* sequences aligned to mule deer (GenBank: AY330343.1) and white-tailed deer (GenBank: AAP37447.1) *Prnp* sequences using ClustalW. **(b)** *Prnp* mRNA and PrP<sup>C</sup> expression levels in the brain presented as fold change and PrP<sup>C</sup>/actin levels, respectively, with C57BL/6N as the control. *Prnp* Ct values were analyzed in CFX Maestro (Biorad) and normalized to actin. PrP and actin signals in WB were quantified using Image Lab (Biorad). Statistical analysis was performed using a one-way ANOVA and graphs were generated in Graphpad Prism v9. The x-axis on both graphs

represents the mouse lines. The y-axis represents the fold change and PrP<sup>C</sup> levels, respectively. ns: non-significant. **(c)** Representative blot for correct cellular processing of PrP<sup>C</sup> as determined by its sensitivity to PNGase-F and resistance to Endo-H digestion. Lanes 1, 5, 9, 13: C57BL/6N BH; lanes 2, 6, 10, 14: *Prnp.Cer.Wt* BH; lanes 3-4, 7-8, 11-12, 15-16: *Prnp.Cer.138NN* BH (2 different mice). Lanes 1-4, 9-12: samples without PNGase-F or Endo-H enzymes; lanes 5-8: samples with PNGase-F enzyme; lanes 13-16: samples with Endo-H enzyme. FL: full-length PrP<sup>C</sup>; C1: C1 fragment of PrP<sup>C</sup> as a product of endogenous alpha-cleavage.

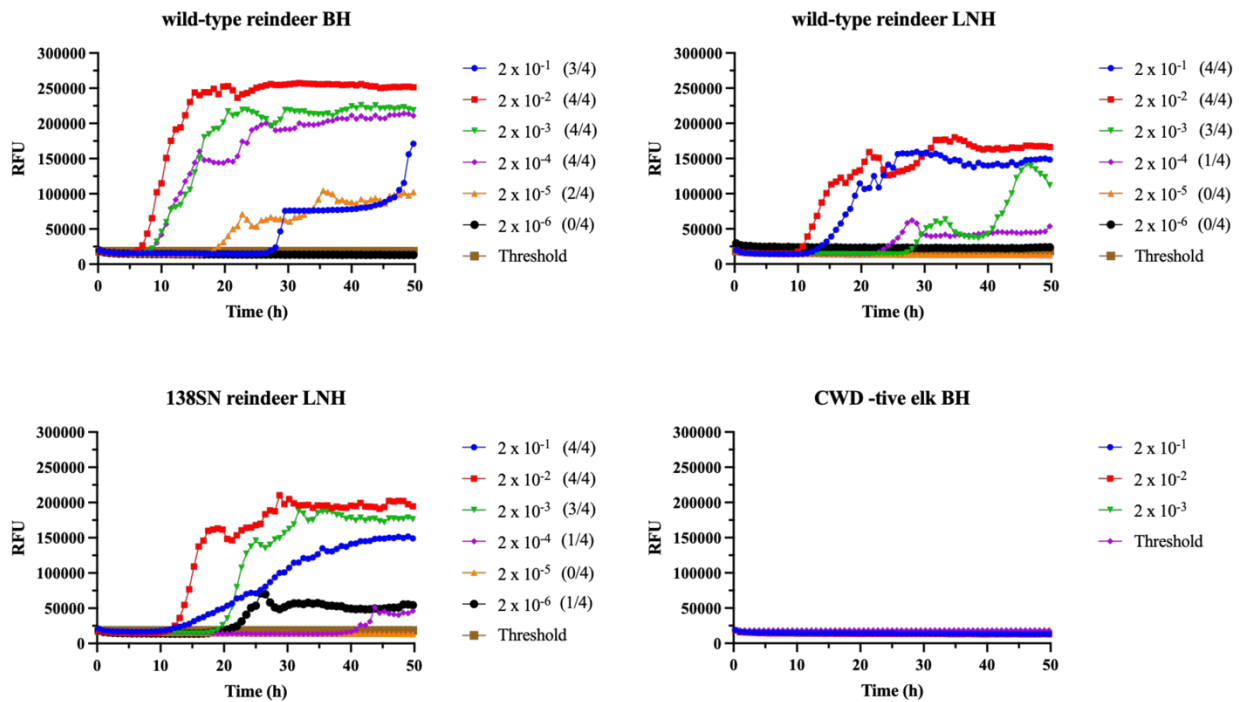

**Figure S2.** Comparison of reindeer inoculum seeding activity in RT-QuIC using mouse recombinant PrP. Ten percent BH and LNH were subjected to serial dilutions from  $2 \times 10^{-2}$  to  $2 \times 10^{-6}$  in RT-QuIC seed dilution buffer. Samples were considered positive when a minimum of 2 out of 4 wells crossed the threshold relative fluorescence unit (RFU). Threshold is the average RFU of all negative control wells plus 5 times their standard deviation. Negative control was a CWD-negative elk BH. The wild-type reindeer BH was positive for prion seed activity up to  $2 \times 10^{-5}$  dilution, while both the wild-type and 138SN reindeer LNHS were positive for prion seed activity up to  $2 \times 10^{-3}$  dilution (100-fold less than the BH). The y-axis represents the RFU, and the x-axis represents time in hours (h). Graphs were generated in Graphpad Prism v9. BH: brain homogenate; LNH: lymph node homogenate; CWD: chronic wasting disease; -tive: negative.

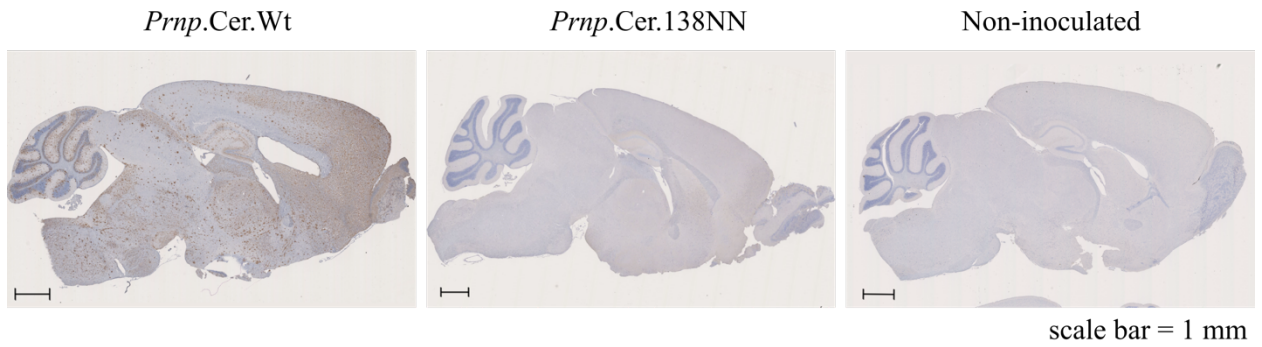

**Figure S3.** Representative immunohistochemistry of whole brain sections from cervid-*Prnp* gene-targeted mice. Left: CWD-infected *Prnp.Cer.Wt* brain; middle: CWD-infected *Prnp.Cer.138NN* brain; right: non-inoculated *Prnp.Cer.Wt* brain. Abnormal PrP deposits were detected using the BAR224 anti-PrP primary antibody (1:2000; Cayman).

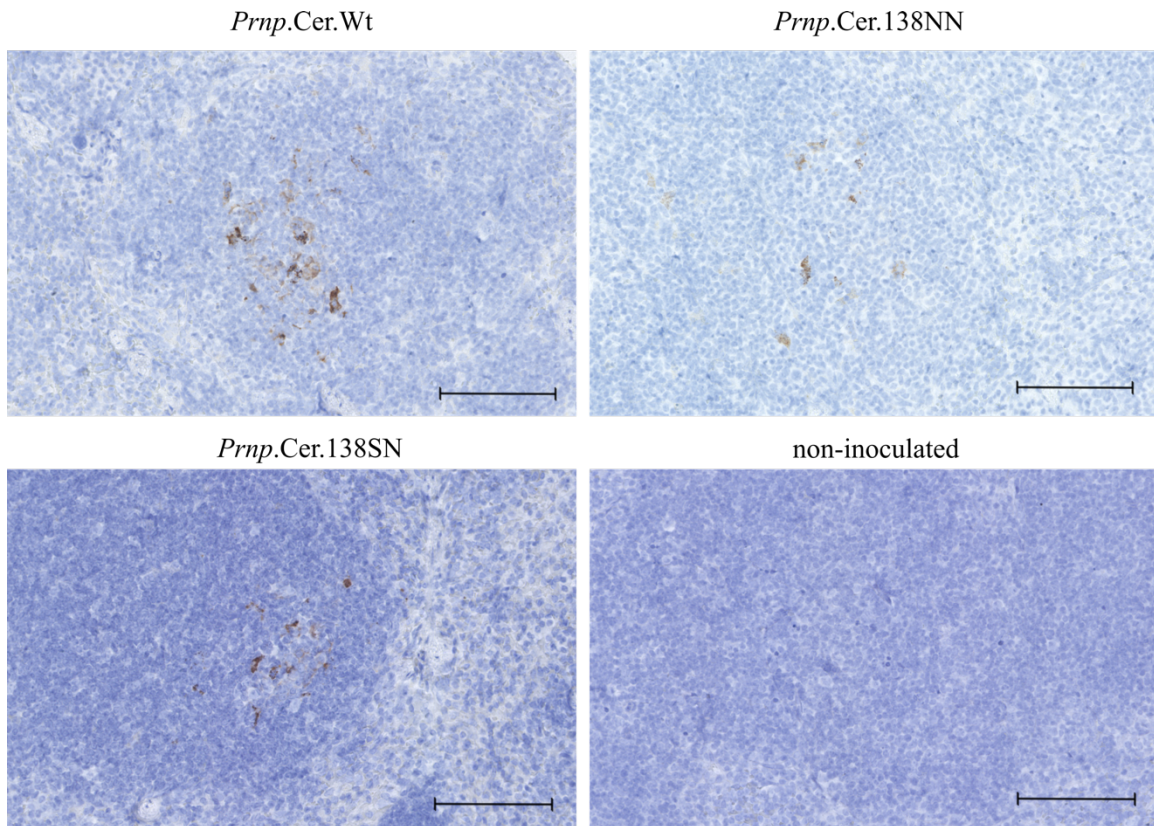

scale bar = 100  $\mu$ m

**Figure S4.** Representative immunohistochemistry of spleen sections from cervid-*Prnp* gene-targeted mice inoculated intracerebrally with the wild-type reindeer brain homogenate isolate. Non-inoculated *Prnp.Cer.Wt* mouse spleen was used as negative control. Abnormal PrP deposits were detected using the BAR224 anti-PrP primary antibody (1:2000; Cayman).

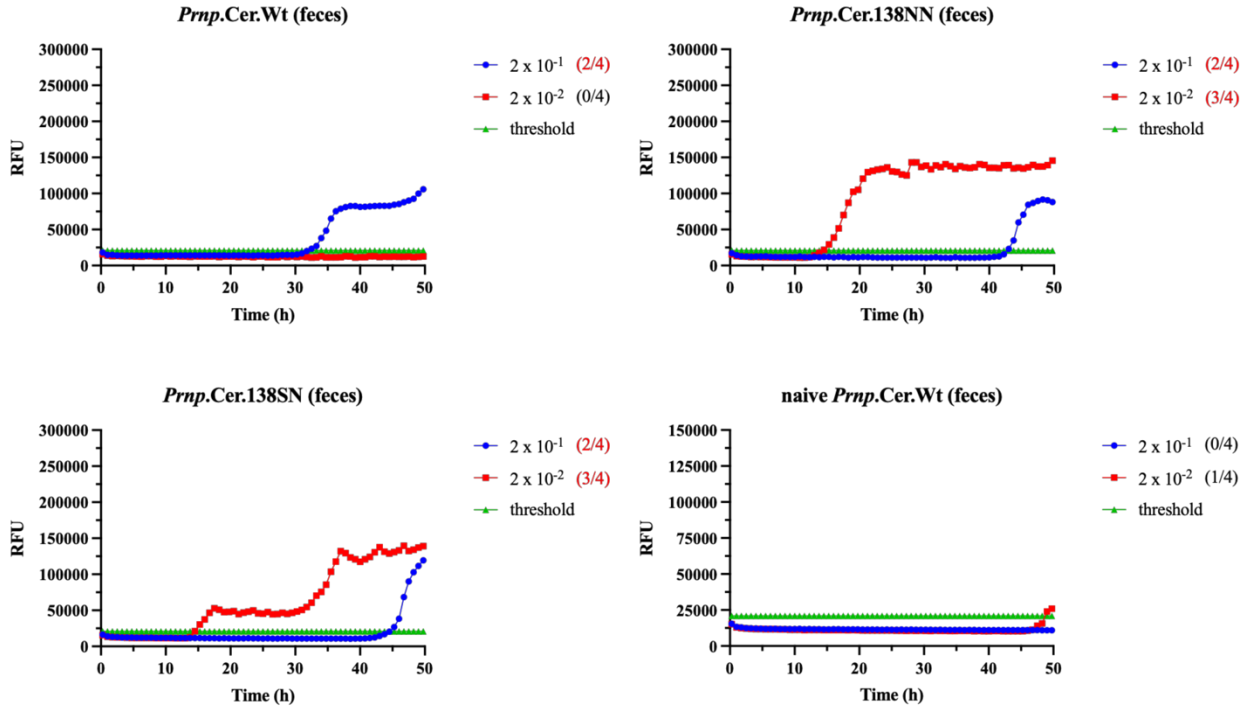

**Figure S5.** Representative RT-QuIC graphs showing prion seeding activity in fecal samples from *Prnp.Cer.Wt*, *Prnp.Cer.138SN* and *Prnp.Cer.138NN* gene-targeted mouse inoculated intracerebrally with the wild-type reindeer BH. Negative control was pooled feces collected from non-inoculated (naïve) *Prnp.Cer.Wt* mice. Samples were considered positive when a minimum of 2 out of 4 wells crossed the threshold, defined as the average RFU of all negative control wells plus 5 times their standard deviation. Positive sample dilutions with number of positive wells per total number of wells are highlighted in red font. The y-axis represents the RFU, and the x-axis represents time in hours (h). Graphs were generated in Graphpad Prism v9.
